# Supplementary material
Source: PubMed Central journal article supplement (PMC6461896)
Supplement: 41386_2018_297_MOESM1_ESM.pdf [file 41386_2018_297_MOESM1_ESM.pdf]

|                                                                                                                                                                                                                                                                                                                                                                                   |                                                |                   |
|-----------------------------------------------------------------------------------------------------------------------------------------------------------------------------------------------------------------------------------------------------------------------------------------------------------------------------------------------------------------------------------|------------------------------------------------|-------------------|
| Manuscript Number<br><b>NPP-18-0737R</b>                                                                                                                                                                                                                                                                                                                                          | Journal Name<br><b>Neuropsychopharmacology</b> | (the "Journal")   |
| Proposed Title of the Article<br>Epigenetic signature for Attention-Deficit/Hyperactivity Disorder: Identification of miR-26b-5p, miR-185-5p, and miR-191-5p as potential biomarkers in peripheral blood mononuclear cells                                                                                                                                                        |                                                | (the "Article")   |
| Author(s) [Please list all authors, continuing on a separate sheet if necessary]:<br>Cristina Sánchez-Mora, María Soler Arigas, Ina Garcia-Martínez, Mireia Pagorola, Paula Rovira, Vanesa Richarte, Montse Corrales, Christian Fedeulhe, Natàlia Padilla, Xavier de la Cruz, Barbara Franke, Alejandro Antas-Vásquez, Miguel Casas, Josep-Antoni Ramos-Quiroga and Maria Ribesés |                                                | (the "Author(s)") |
| Miscellaneous [for office use only]:                                                                                                                                                                                                                                                                                                                                              |                                                |                   |

**1. American College of Neuropsychopharmacology ('Licensee')**  
will consider publishing this article, including any supplementary information and graphic elements therein (e.g. illustrations, charts, moving images) (the 'Article'). Headings are for convenience only.

**2. Grant of Rights**  
In consideration of the Licensee evaluating the Article for publication, the Author(s) grant the Licensee the exclusive (except as set out in clauses 3, 4 and 5a) iv) and sub-licensable right, unlimited in time and territory, to copy-edit, reproduce, publish, distribute, transmit, make available and store the Article, including abstracts thereof, in all forms of media of expression now known or developed in the future, including pre- and reprints, translations, photographic reproductions and extensions. Furthermore, to enable additional publishing services, such as promotion of the Article, the Author(s) grant the Licensee the right to use the Article (including the use of any graphic elements on a stand-alone basis) in whole or in part in electronic form, such as for display in databases or data networks (e.g. the Internet), or for print or download to stationary or portable devices. This includes interactive and multimedia use as well as posting the Article in full or in part or its abstract on social media, and the right to alter the Article to the extent necessary for such use. The Licensee may also let third parties share the Article in full or in part or its abstract on social media and may in this context sub-license the Article and its abstract to social media users. Author(s) grant to Licensee the right to re-license Article metadata without restriction (including but not limited to author name, title, abstract, citation, references, keywords and any additional information as determined by Licensee).

**3. Self-Archiving**  
Author(s) are permitted to self-archive a pre-print and an author's accepted manuscript version of their Article.  
a) A pre-print is the author's version of the Article before peer-review has taken place ("Pre-Print"). Prior to acceptance for publication, Author(s) retain the right to make a Pre-Print of their Article available on any of the following: their own personal, self-maintained website; a legally compliant, non-commercial pre-print server such as but not limited to arXiv and bioRxiv. Once the Article has been published, the Author(s) should update the acknowledgement and provide a link to the definitive version on the publisher's website: "This is a pre-print of an article published in [insert journal title]. The final authenticated version is available online at: [https://doi.org/\[insert DOI\]](https://doi.org/[insert DOI])"  
b) An Author's Accepted Manuscript ("AAM") is the version accepted for publication in a journal following peer review but prior to copyediting and typesetting that can be made available under the following conditions:  
i) Author(s) retain the right to make an AAM of their Article available on their own personal, self-maintained website immediately on acceptance,  
ii) Author(s) retain the right to make an AAM of their Article available for public release on any of the following 6 months after first publication ("Embargo Period"): their employer's internal website; their institutional and/or funder repositories. AAMs may also be deposited in such repositories immediately on acceptance, provided that they are not made publicly available until after the Embargo Period.  
An acknowledgement in the following form should be included, together with a link to the published version on the publisher's website: "This is a post-peer-review, pre-copyedit version of an article published in [insert journal title]. The final authenticated version is available online at: [http://dx.doi.org/\[insert DOI\]](http://dx.doi.org/[insert DOI])"

**4. Author's Retained Rights**  
Author(s) retain the following non-exclusive rights for the published version provided that, when reproducing the Article or extracts from it, the Author(s) acknowledge and reference first publication in the Journal:  
a) to reuse graphic elements created by the Author(s) and contained in the Article, in presentations and other works created by them;  
b) they and any academic institution where they work at the time may reproduce the

Article for the purpose of course teaching (but not for inclusion in course pack material for onward sale by libraries and institutions); and  
c) to reproduce, or to allow a third party Licensee to reproduce the Article in whole or in part in any printed volume (book or thesis) written by the Author(s).

**5. Warranties**  
The Author(s) warrant and represent that:  
a) (i) the Author(s) are the sole copyright owners or have been authorised by any additional copyright owner to assign the rights defined in clause 2, (ii) the Article does not infringe any intellectual property rights (including without limitation copyright, database rights or trade mark rights) or other third party rights and no licence from or payments to a third party are required to publish the Article, (iii) the Article has not been previously published or licensed, (iv) if the Article contains materials from other sources (e.g. illustrations, tables, text quotations), Author(s) have obtained written permissions to the extent necessary from the copyright holder(s), to license to the Licensee the same rights as set out in clause 2 but on a non-exclusive basis and without the right to use any graphic elements on a stand-alone basis and have cited any such materials correctly;  
b) all of the facts contained in the Article are according to the current body of science true and accurate;  
c) nothing in the Article is obscene, defamatory, violates any right of privacy or publicity, infringes any other human, personal or other rights of any person or entity or is otherwise unlawful and that informed consent to publish has been obtained for all research participants;  
d) nothing in the Article infringes any duty of confidentiality which any of the Author(s) might owe to anyone else or violates any contract, express or implied, of any of the Author(s). All of the institutions in which work recorded in the Article was created or carried out have authorised and approved such research and publication; and  
e) the signatory (the Author or the employer) who has signed this agreement has full right, power and authority to enter into this agreement on behalf of all of the Author(s).

**6. Cooperation**  
a) The Author(s) shall cooperate fully with the Licensee in relation to any legal action that might arise from the publication of the Article and the Author(s) shall give the Licensee access at reasonable times to any relevant accounts, documents and records within the power or control of the Author(s). The Author(s) agree that the distributing entity is intended to have the benefit of and shall have the right to enforce the terms of this agreement.  
b) The Author(s) authorise the Licensee to take such steps as it considers necessary at its own expense in the Author(s)' name and on their behalf if the Licensee believes that a third party is infringing or is likely to infringe copyright in the Article including but not limited to initiating legal proceedings.

**7. Author List**  
After signing, changes of authorship or the order of the authors listed will not be accepted unless formally approved in writing by the Licensee.

**8. Edits & Corrections**  
The Author(s) agree(s) that the Licensee may retract the Article or publish a correction or other notice in relation to the Article if the Licensee considers in its reasonable opinion that such actions are appropriate from a legal, editorial or research integrity perspective.

**9. Governing Law**  
This agreement shall be governed by, and shall be construed in accordance with, the laws of the State of New York. The courts of New York, New York shall have the exclusive jurisdiction.

|                                                                                                                                   |                                             |                            |
|-----------------------------------------------------------------------------------------------------------------------------------|---------------------------------------------|----------------------------|
| Signed for and on behalf of the Author(s):<br> | Print Name:<br><b>Cristina Sanchez-Mora</b> | Date:<br><b>26/09/2018</b> |
| (PLEASE NOTE, ONLY HANDWRITTEN SIGNATURES ARE ACCEPTED)                                                                           |                                             |                            |
| Address:<br><b>VHIR research institute, Hospital Vall d'hebron. Pg/Vall d'hebron 119-129, 08035 Barcelona. Spain</b>              |                                             |                            |
